# Supplementary material for: Development of a disposable paper-based thin film solid-phase microextraction sampling kit to quantify ketone body
Source: Royal Society of Chemistry journal article supplement (doi:10.1039/d4ra05907g), 2024-01-01
Supplement: d4ra05907g1.pdf [file d4ra05907g1.pdf]

### Supporting Information:

## Development of disposal paper-based thin film solid-phase microextraction sampling kit to quantify the ketone body

Debsmita Mandal<sup>a</sup>, Indrayani Dey<sup>a</sup> and Chiranjit Ghosh<sup>a,b\*</sup>

<sup>a</sup>*Department of Biotechnology, Manipal Institute of Technology, Manipal Academy of Higher Education, Manipal, Karnataka 576104, India*

<sup>b</sup>*Harvard Medical School, 25 Shattuck Street, Boston, 02115, MA, USA*

\*Corresponding Author: Chiranjit Ghosh      Email: [chiranjit.ghosh@manipal.edu](mailto:chiranjit.ghosh@manipal.edu)

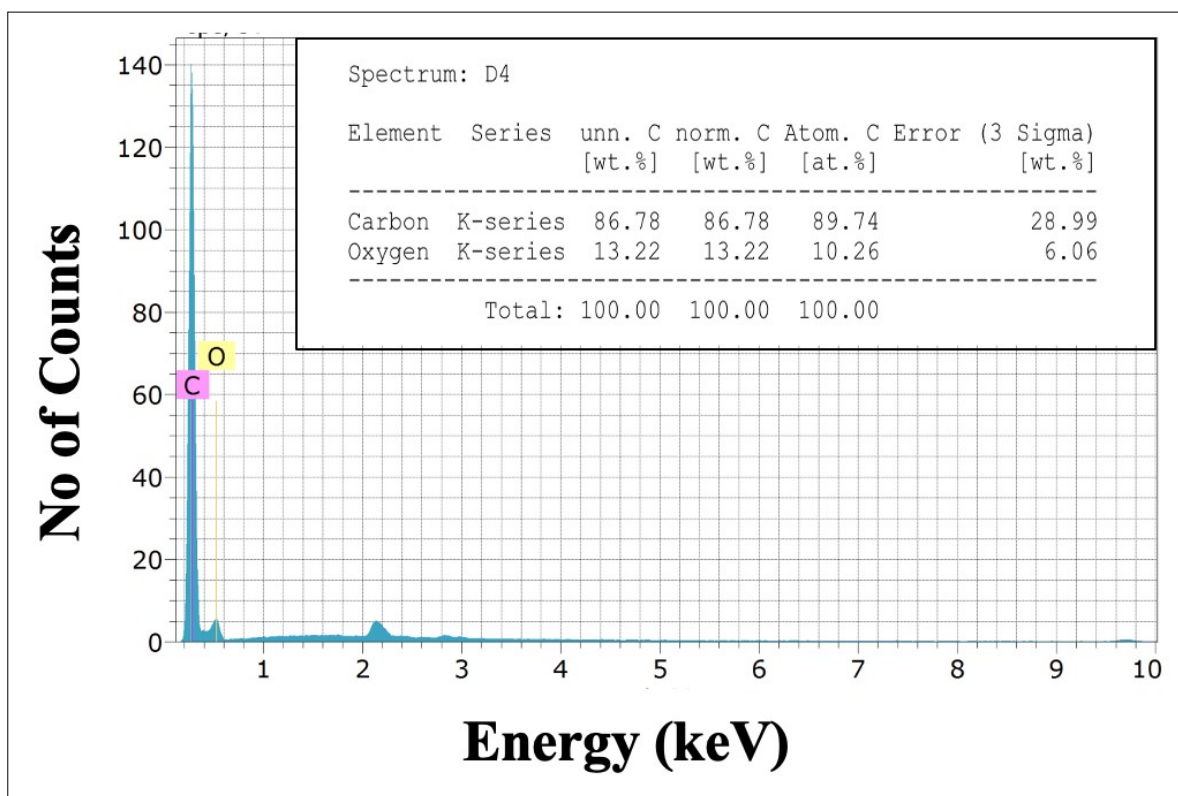

Fig.S1. SEM-EDAX image and data of synthesized DVB particles [BRUKER (German), model: Nano XFlash Detector]

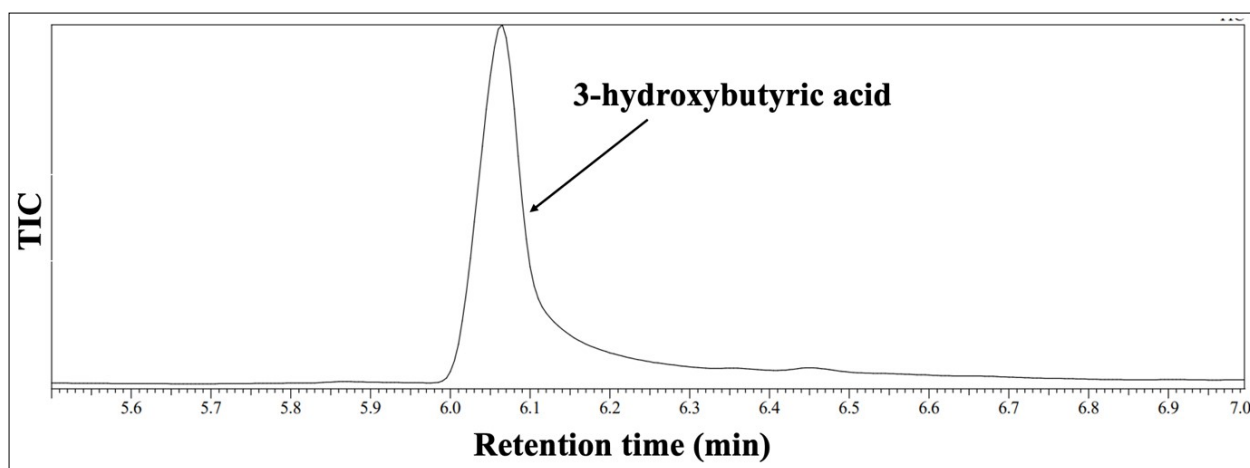

Fig.S2. Chromatogram of BHB at RT 6min in PBS matrix by paper-based TF-SPME
